# Supplementary material
Source: PubMed Central journal article supplement (PMC5960457)
Supplement: 12264_2018_221_MOESM1_ESM.pdf [file 12264_2018_221_MOESM1_ESM.pdf]

## Supplementary Materials

### **ZNF804A Variation May Affect Hippocampal-Prefrontal Resting-State Functional Connectivity in Schizophrenic and Healthy Individuals**

Yuyanan Zhang, Hao Yan, Jinmin Liao, Hao Yu, Sisi Jiang, Qi Liu, Dai Zhang, Weihua Yue

**Table S1.** Regions of significant main effect of diagnosis in resting-state imaging analysis ( $P < 0.05$  after FDR correction, cluster size  $>10$ )

| ROI region        | Cortical region | Cluster size | MNI coordinates |     |    | F value |
|-------------------|-----------------|--------------|-----------------|-----|----|---------|
|                   |                 |              | X               | Y   | Z  |         |
| Left Hippocampus  | Right Thalamus  | 26           | 6               | -18 | 12 | 24.57   |
|                   |                 |              | 12              | -30 | 6  | 23.06   |
| Right Hippocampus | Right Thalamus  | 28           | 6               | -24 | 6  | 29.35   |
|                   |                 |              | -3              | -9  | 6  | 25.17   |

MNI, Montreal Neurological Institute

**Table S2.** Regions of significant main effect of genotype in resting-state imaging analysis when the left hippocampus was treated as the seed region ( $P < 0.001$  uncorrected, cluster size  $>10$ )

| Cortical region                           | Brodmann area | Cluster size | MNI coordinates |    |    | F value |
|-------------------------------------------|---------------|--------------|-----------------|----|----|---------|
|                                           |               |              | X               | Y  | Z  |         |
| Right dorsolateral superior frontal gyrus | BA9           | 19           | 21              | 42 | 33 | 13.43   |
| Right dorsolateral middle frontal gyrus   | BA9           | 14           | 39              | 36 | 33 | 11.35   |
| Left middle frontal gyrus                 | BA8, 9        | 17           | -27             | 24 | 36 | 9.45    |

MNI, Montreal Neurological Institute

**Table S3.** Significant correlation of the left hippocampal-right dorsolateral middle frontal

resting-state functional connectivity and behavior.

| Diagnoses | Genotype    | Cognitive performance      | PANSS score                 |
|-----------|-------------|----------------------------|-----------------------------|
|           |             | WMS-R                      | Total                       |
| SZ        | AA genotype | ( $r = 0.665, P = 0.005$ ) | ( $r = -0.498, P = 0.035$ ) |
|           |             | CFT                        | General                     |
|           |             | ( $r = 0.679, P = 0.002$ ) | ( $r = -0.518, P = 0.028$ ) |

The mean strength of resting-state functional connectivity between the left hippocampus and the right dorsolateral middle frontal region was significantly correlated with different models of cognitive performance and the severity of symptom in patients. The numbers are the Pearson correlation coefficients for the left hippocampus-right DLPFC resting-state functional connectivity and neuropsychological test scores. SZ, schizophrenic patients; HC, healthy controls; WMS-R, Wechsler Memory Scale-Revised; CFT, Category Fluency Test-animal Naming; PANSS, Positive and Negative Syndrome Scale; Total, total PANSS score; Negative, negative symptom scores in PANSS.

**Table S4.** Significant correlation of left hippocampal-left middle frontal resting-state functional connectivity and behavior.

| Diagnosis | Genotype    | Cognitive performance       |
|-----------|-------------|-----------------------------|
|           |             | DSST                        |
| SZ        | CA genotype | ( $r = -0.596, P = 0.019$ ) |
|           |             | CFT                         |
|           | AA genotype | ( $r = 0.556, P = 0.016$ )  |

The mean strength of resting-state functional connectivity between the left hippocampus and the left middle frontal region was significantly correlated with different measures of cognitive performance. The numbers are the Pearson correlation coefficients for left hippocampal-left middle frontal resting-state functional connectivity and neuropsychological test scores. SZ, schizophrenic patients; HC, healthy controls; DSST, Digit Symbol Substitution Test; CFT, scores of Category Fluency Test-animal naming.

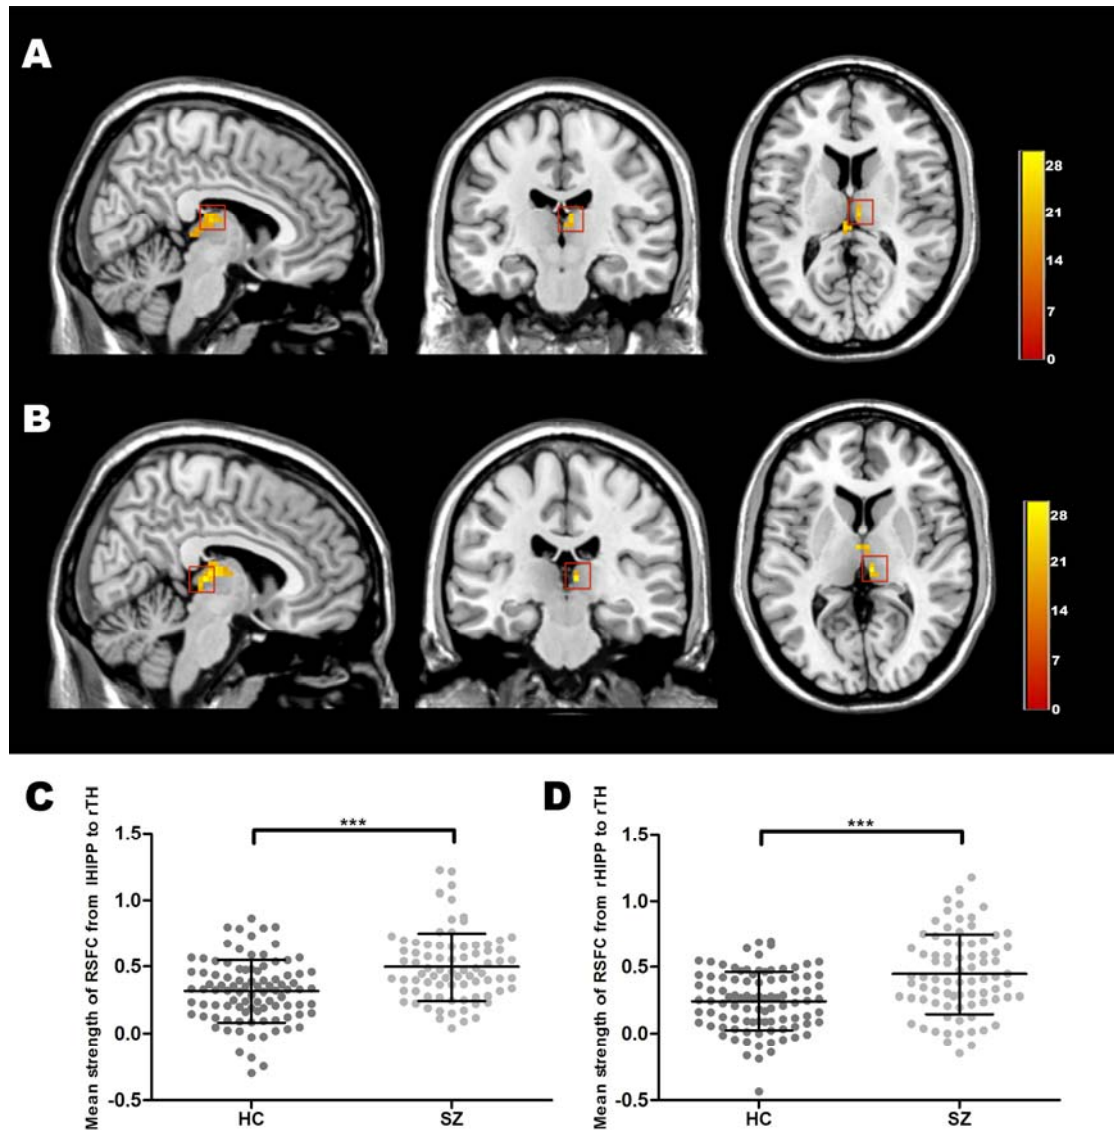

**Fig. S1 Main effect of diagnosis on hippocampal-thalamic functional connectivity.**

**A** Region (red box) with a significant diagnosis main effect for functional connectivity from the left hippocampus (IHIPP) to the right thalamus (rTH) (peak MNI coordinates:  $x = 6, y = -18, z = 12$ , peak F-score = 24.57,  $p < 0.001$  after FDR correction, cluster size = 26). **B** Region (red box) with a significant diagnosis main effect for functional connectivity from the right hippocampus (rHIPP) to the right thalamus (rTH) (peak MNI coordinates:  $x = 6, y = -24, z = 6$ , peak F-score = 29.35,  $p < 0.001$  after FDR correction, cluster size = 28). **C** Scatterplot of the mean strength of resting-state functional connectivity (RSFC) (mean  $\pm$  SD) between the left hippocampus and the spherical region with the peak atlas [6 -18 12] as center and 6 mm as the radius. The Y-axis indicates the Z-score. **D** Scatterplot of the mean RSFC strength (mean  $\pm$  SD) between rHF and the spherical region with the peak atlas [6 -24 6] as center and 6 mm as the radius. The Y-axis indicates the Z-score. SZ,

schizophrenic patients; HC, healthy controls; \*\*\* $P < 0.001$ .

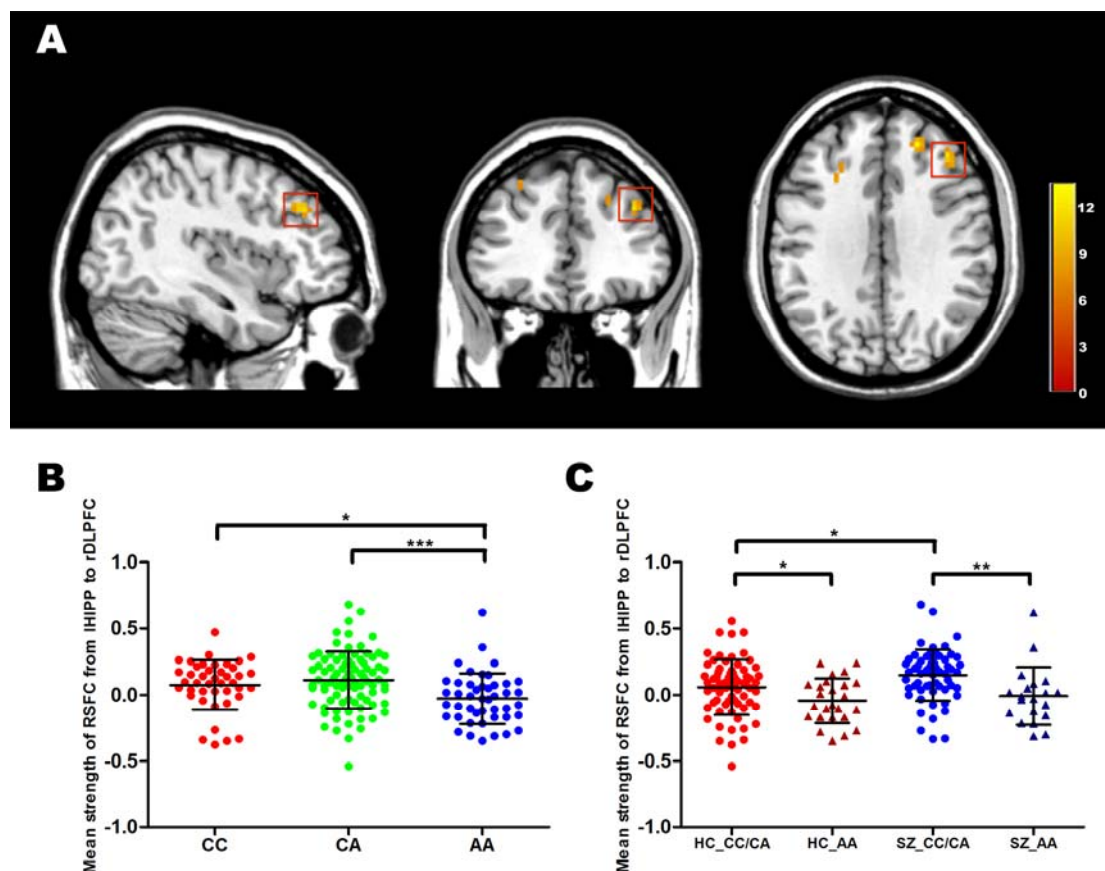

**Fig. S2 Effects of ZNF804A rs1344704 on left hippocampal-right dorsolateral middle frontal functional connectivity** **A** Another frontal region (red box) with a significant genotype main effect for functional connectivity from the left hippocampus to the right DLPFC (peak MNI coordinates:  $x = 39, y = 36, z = 33$ , peak  $F$ -score = 11.35,  $p < 0.001$ , cluster size = 14). Color bar indicates  $F$ -score. **B** Scatterplot of the mean strength of resting-state functional connectivity (RSFC) (mean  $\pm$  SD) between the left hippocampus and the spherical region with the peak atlas [39 36 33] as center and 6 mm as the radius in the three genotype groups. The Y-axis indicates the Z-score. **C** Scatterplot of the mean RSFC strength (mean  $\pm$  SD) from the left hippocampus to the right DLPFC in the genotype groups (CC/CA and AA) in different diagnostic groups. The Y-axis indicates the Z-score. SZ, schizophrenic patients; HC, healthy controls; IHIPP, left hippocampus; rDLPFC, right dorsolateral prefrontal cortex. \* $P < 0.05$ , \*\*  $P < 0.01$ , \*\*\*  $P < 0.001$ .

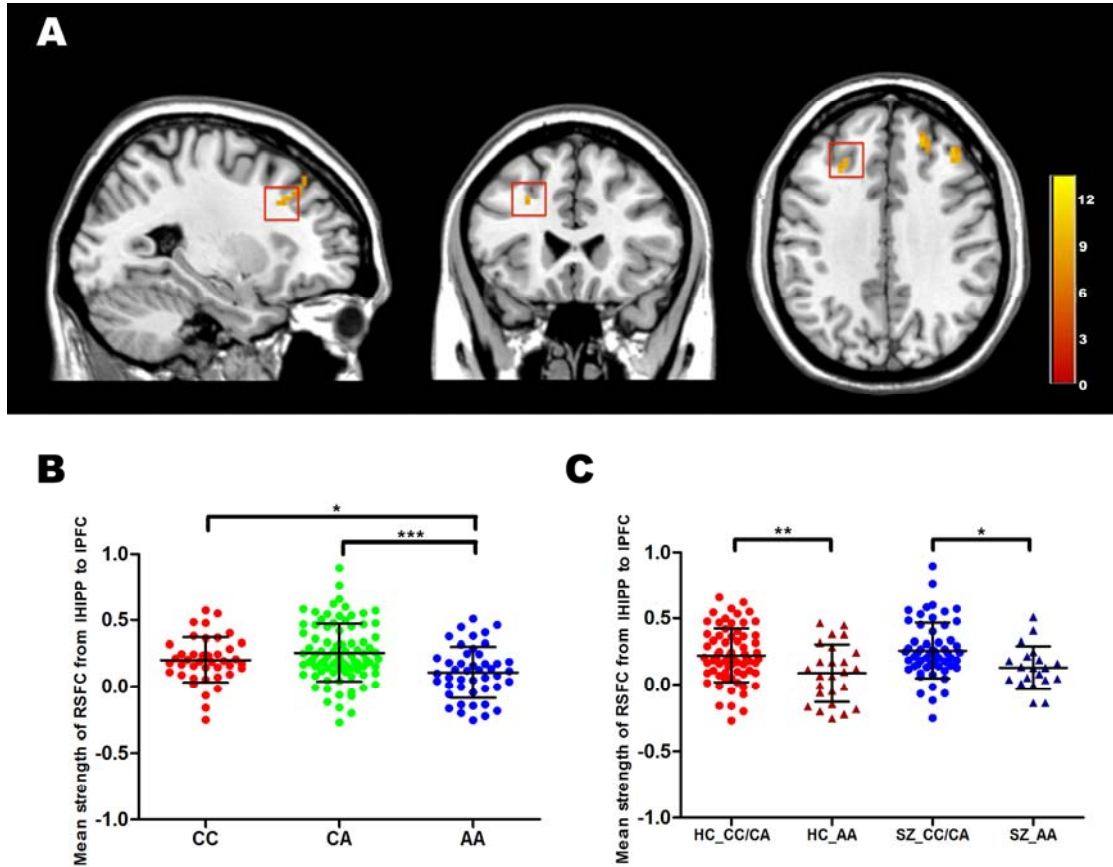

**Fig. S3 Effects of ZNF804A rs1344704 on left hippocampal-left middle frontal functional connectivity.** **A** A left frontal region (red box) with a significant genotype main effect for functional connectivity from the left hippocampus to the left middle prefrontal cortex (peak MNI coordinates:  $x = -27$ ,  $y = 24$ ,  $z = 36$ , peak F-score = 9.45,  $p < 0.001$ , cluster size = 17). Color bar indicates F-score. **B** Scatterplot of the mean strength of resting-state functional connectivity (RSFC) (mean  $\pm$  SD) between the left hippocampus and the spherical region with peak atlas  $[-27\ 24\ 36]$  as the center and 6 mm as the radius in the three genotype groups. The Y-axis indicates the Z-score. **C** Scatterplot of the mean RSFC strength (mean  $\pm$  SD) from the left hippocampus to the left DLPFC in the genotype groups (CC/CA and AA) of different diagnostic groups. The Y-axis indicates the Z-score. SZ, schizophrenic patients; HC, healthy controls; IHIPP, left hippocampus; IPFC, left prefrontal cortex. \* $P < 0.05$ , \*\* $P < 0.01$ , \*\*\* $P < 0.001$ .

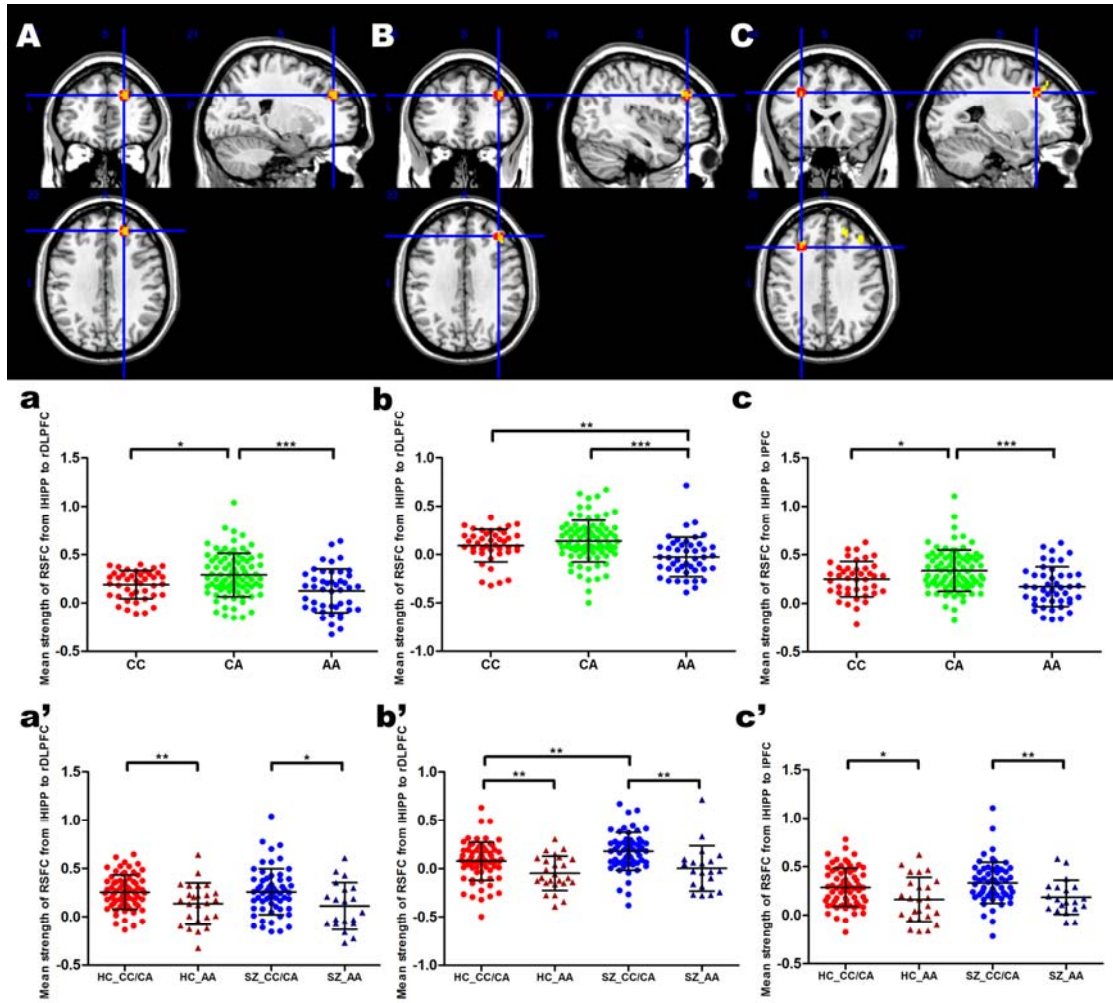

**Fig. S4** Comparisons of three spherical regions with the peak atlas as center and 6 mm as the radius and three masks of original regions. A–C Spherical regions in red and original regions in yellow. **a**, **a'** Analysis with peak atlas mask [21 42 33]; **b**, **b'** Analysis with peak atlas mask [39 36 33]; **c**, **c'** Analysis with peak atlas mask [-27 24 36]; \* $P < 0.05$ , \*\* $P < 0.01$ , \*\*\* $P < 0.001$ .
